# Supplementary material
Source: PubMed Central journal article supplement (PMC3964351)
Supplement: 10-1055-s-0033-1360115-sup_gf713.pdf [file 10-1055-s-0033-1360115-sup_gf713.pdf]

# S3-Leitlinie „Therapie entzündlicher Brusterkrankungen in der Stillzeit“

AWMF Leitlinien-Register Nr. 015/071 (Kurzfassung)

S3-Guidelines for the Treatment of Inflammatory Breast Disease during the Lactation Period

AWMF Guidelines, Registry No. 015/071 (short version)

## Autoren

A. Jacobs<sup>1,2</sup>, M. Abou-Dakn<sup>3</sup>, K. Becker<sup>4</sup>, D. Both<sup>5</sup>, S. Gatermann<sup>6</sup>, R. Gresens<sup>7</sup>, M. Groß<sup>8</sup>, F. Jochum<sup>9</sup>, M. Kühnert<sup>10</sup>, E. Rouw<sup>11</sup>, M. Scheele<sup>12</sup>, A. Strauss<sup>13</sup>, A.-K. Stempel<sup>14</sup>, K. Vetter<sup>15</sup>, A. Wöckel<sup>16</sup>

## Institute

Die Institutsangaben sind am Ende des Beitrags gelistet.

## Schlüsselwörter

- Leitlinie
- Therapie
- Mamma
- Mastitis puerperalis
- Stillen

## Key words

- guidelines
- therapy
- breast
- mastitis
- breastfeeding

## Bibliografie

**DOI** <http://dx.doi.org/10.1055/s-0033-1360115>  
Geburtsh Frauenheilk 2013; 73:  
1–7 © Georg Thieme Verlag KG  
Stuttgart · New York ·  
ISSN 0016-5751

## Korrespondenzadresse

**Anja Jacobs**  
Division of Evidence based  
Medicine (dEBM)  
Klinik für Dermatologie,  
Venerologie und Allergologie  
Charité – Universitätsmedizin  
Berlin  
Charitéplatz 1  
10117 Berlin  
[anja.jacobs@charite.de](mailto:anja.jacobs@charite.de)

## Zusammenfassung

Stillen gilt als die optimale Ernährungsform für gesunde reif geborene Säuglinge und ist mit einer Vielzahl an Vorteilen für Gesundheit und Entwicklung verbunden. Jedoch führen Stillprobleme häufig zu einem frühzeitigen Abbruch der Stillbeziehung. Um eine optimale Betreuung von stillenden Frauen zu gewährleisten, sind einheitliche Handlungsempfehlungen für die Therapie der stillassoziierten Brusterkrankungen notwendig. Auf Initiative der Nationalen Stillkommission wurde eine evidenz- und konsensbasierte Leitlinie zur Therapie wunder Brustwarzen, der verstärkten initialen Brustdrüschenschwellung, der Mastitis puerperalis und des Milchstaus entwickelt. Die Leitlinienentwicklung folgte methodisch den Kriterien der Arbeitsgemeinschaft der Wissenschaftlichen Medizinischen Fachgesellschaften (AWMF). Die Empfehlungen wurden basierend auf systematischen Recherchen und Bewertungen der Literatur und unter Berücksichtigung praktischer Erfahrungen in einer interdisziplinär zusammengesetzten Expertengruppe abgeleitet. Zusätzlich wurden Klinische Konsensuspunkte als Expertenmeinung zu Fragestellungen formuliert, zu denen keine wissenschaftlichen Untersuchungen möglich sind oder angestrebt werden. Im vorliegenden Artikel werden die Empfehlungen der S3-Leitlinie zusammenfassend präsentiert.

## Abkürzung

KKP      Klinischer Konsensuspunkt

## Abstract

Breastfeeding is widely acknowledged to be the best and most complete form of nutrition for healthy infants born at term and is associated with numerous benefits in terms of infants' health, growth, immunity and development. However, breastfeeding problems often result in early weaning. Standardized treatment recommendations for breastfeeding-related diseases are necessary to optimize the care offered to breastfeeding women. Evidence and consensus based guidelines for the treatment of puerperal mastitis, sore nipples, engorgement and blocked ducts were developed on the initiative of the National Breastfeeding Committee. These guidelines were developed in accordance with the criteria set up by the *Arbeitsgemeinschaft der Wissenschaftlichen Medizinischen Fachgesellschaften* (AWMF), the Association of Scientific Medical Societies in Germany. The recommendations were drawn up by an interdisciplinary group of experts and were based on a systematic search and evaluation of the literature but also took clinical experience into account. Additionally good clinical practice (GCP) in terms of expert opinion was formulated in cases where scientific investigations could not be performed or were not aimed for. This article presents a summary of the recommendations of the S3-guidelines.

## Einleitung

Stillen ist die natürliche und optimale Ernährungsform für gesunde reif geborene Säuglinge. In Deutschland wird daher empfohlen, Säuglinge in den ersten Monaten ausschließlich zu stillen. Stillprobleme, wie Brustentzündung oder wunde

Brustwarzen, führen jedoch häufig zu einem frühzeitigen Abbruch der Stillbeziehung [1–3]. Im Sinne der Stillförderung ist es von entscheidender Bedeutung, diese mit dem Stillen assoziierten Brusterkrankungen optimal zu behandeln. Die Nationale Stillkommission hat in Zusammenarbeit mit der Deutschen Gesellschaft für Gynäkologie und Geburtshilfe die Entwicklung einer evidenz- und konsensbasierten Leitlinie (S3) zum Thema „Therapie von entzündlichen Brusterkrankungen in der Stillzeit“ initiiert. Die Leitlinie hat das Ziel, die Versorgung stillender Frauen mit Stillproblemen zu verbessern.

Die Entwicklung der Leitlinie folgte methodisch den Kriterien der Arbeitsgemeinschaft der Wissenschaftlichen Medizinischen Fachgesellschaften (AWMF). In einer interdisziplinär zusammengesetzten Leitliniengruppe, in der 14 verschiedene Organisationen (● **Tab. 1**) vertreten waren, wurden auf Grundlage der Evidenz und der klinischen Erfahrungen Empfehlungen zur Therapie folgender Brusterkrankungen abgeleitet:

- ▶ wunde Brustwarzen
- ▶ verstärkte initiale Brustdrüsenanschwellung
- ▶ Milchstau
- ▶ Mastitis puerperalis

**Tab. 1** Beteiligte Fachgesellschaften, Berufsverbände und andere Organisationen.

|                                                                                           |
|-------------------------------------------------------------------------------------------|
| Arbeitsgemeinschaft freier Stillgruppen (AFS) e. V.                                       |
| Berufsverband Deutscher Laktationsberaterinnen IBCLC (BDL) e. V.                          |
| Berufsverband der Frauenärzte (BVf) e. V.                                                 |
| Deutsche Gesellschaft für Gynäkologie und Geburtshilfe (DGGG) e. V.                       |
| Deutsche Gesellschaft für Hebammenwissenschaft (DGHWi) e. V.                              |
| Deutsche Gesellschaft für Hygiene und Mikrobiologie (DGHM) e. V.                          |
| Deutsche Gesellschaft für Kinder- und Jugendmedizin (DGKJ) e. V.                          |
| Deutsche Gesellschaft für Perinatale Medizin (DGPM) e. V.                                 |
| Deutsche Gesellschaft für Psychosomatische Frauenheilkunde und Geburtshilfe (DGPFg) e. V. |
| Deutsche Gesellschaft für Senologie e. V.                                                 |
| Deutscher Hebammenverband e. V.                                                           |
| La Leche Liga Deutschland e. V.                                                           |
| Paul-Ehrlich-Gesellschaft für Chemotherapie (PEG) e. V.                                   |
| WHO/UNICEF-Initiative „Babyfreundlich“                                                    |

Jeder Empfehlung wurde auf Basis der Evidenz und anderer Kriterien (z. B. Patientenpräferenzen, ethische Verpflichtungen, Anwendbarkeit) eine Empfehlungsstärke zugeordnet und mit A, B oder 0 gekennzeichnet (● **Tab. 2**). Zusätzlich zu den Empfehlungen wurden Klinische Konsenspunkte (KKP) aufgrund von klinischen Erfahrungen der Mitglieder der Leitliniengruppe als ein Standard der Behandlung, bei dem keine wissenschaftlichen Untersuchungen möglich sind oder angestrebt werden, formuliert.

**Tab. 2** Graduierung der Empfehlungen.

| Empfehlungsstärke | sprachliche Formulierung | Symbol |
|-------------------|--------------------------|--------|
| starke Empfehlung | „soll“                   | A      |
| Empfehlung        | „sollte“                 | B      |
| offene Empfehlung | „kann“                   | 0      |

Dieser Artikel ist eine Kurzfassung der S3-Leitlinie. Es wird ausdrücklich auf die Langfassung und die darin enthaltene Beschreibung der Evidenzlage zu den einzelnen Empfehlungen verwiesen. Die Langfassung sowie der Methodenreport der Leitlinie sind online frei zugänglich unter <http://www.awmf.org/>.

### Wunde Brustwarzen

Bei wunden Brustwarzen handelt es sich um verletzte Brustwarzen mit oder ohne Infektionen.

### Symptome wunder Brustwarzen

- ▶ Fissuren
- ▶ Hautabschürfungen
- ▶ Rhagaden
- ▶ Entzündungszeichen an Mamille und/oder Areola:
  - ▶ Schmerzen, vor allem beim Ansaugen
  - ▶ Rötungen
  - ▶ Ödeme
  - ▶ Überwärmung
- ▶ Schorfbildung
- ▶ helle oder dunkle Flecken auf der Mamille

Bei Vorliegen einer bakteriellen Infektion können auf den wunden, geröteten Mamillen zum Teil eitrig oder gelbe Beläge auftreten [4–6].

### Differenzialdiagnosen

- ▶ *Candida*-Infektion der Brust(-warze)
- ▶ Dermatitis
- ▶ traumatische Läsionen
- ▶ maligne Erkrankungen
- ▶ Morbus Paget

### Empfehlungen zur Therapie wunder Brustwarzen in der Stillzeit

#### Klinischer Konsensuspunkt

- Vor Beginn einer Therapie wunder Brustwarzen sollen folgende Ursachen evaluiert werden (KKP):
- ▶ Stilltechnik (Position und Frequenz)
  - ▶ Saugtechnik des Kindes
  - ▶ Anwendung von Stillhilfsmitteln (Pumpen, Stillhütchen)
  - ▶ anatomische Besonderheiten beim Kind und der Mutter
  - ▶ psychische Faktoren
  - ▶ verstärkte initiale Brustdrüsenanschwellung

Anatomische Faktoren der Mutter (Flach- oder Hohlwarzen) oder Faktoren des Kindes (Fehl- oder Fehllage der Zunge, ein zu kurzes Zungen- oder Lippenbändchen, (Unter-)Kiefer-Asymmetrien, Gaumenbesonderheiten) beeinflussen die Anlege- und Saugtechnik [7–10]. In diesen Fällen sollte dem korrekten Anlegen besonders große Aufmerksamkeit gewidmet werden. Die genannten anatomischen Besonderheiten sind nicht Gegenstand der Leitlinie, deren Vorliegen soll aber vor Therapiebeginn überprüft werden. Bei Verwendung von Hilfsmitteln (Pumpen, Stillhütchen) ist auf eine korrekte Anwendung zu achten. Pumpen sollten richtig positioniert und Brusthütchen korrekt angebracht werden. Neben dem korrekten Anlegen und Positionieren des Kindes unterstützen wechselnde Stillpositionen und Maßnahmen zur Auslösung des Milchspendereflexes (Entspannung, Massage, feuchte Wärm-

me) die Behandlung wundter Brustwarzen. Stillen bedeutet körperliche und gefühlsmäßige Nähe. Bewusste und unbewusste Gefühle werden dabei vermittelt und können sich störend in der Mutter-Kind-Interaktion auswirken. Psychosomatische Aspekte sollten bei wunden Brustwarzen beachtet und in die Behandlung einbezogen werden.

#### Hinweise zur Pflege

Bei der Therapie wundter Brustwarzen sind die allgemeinen Regeln der Händehygiene einzuhalten. Wenn Stilleinlagen verwendet werden, sollte aus Hygienegründen auf einen häufigen Wechsel geachtet und luftdurchlässige Artikel bevorzugt werden.

#### Therapie wundter Brustwarzen

Bei intakter Haut sind keine lokalen Maßnahmen erforderlich.

##### Evidenz- und konsensbasierte Empfehlung

Aufgrund der Evidenzlage kann derzeit keine Empfehlung für oder gegen eine topische Anwendung von hochgereinigtem Lanolin oder Muttermilch in der Therapie wundter Brustwarzen ausgesprochen werden (0).

Zur topischen Behandlung wundter Brustwarzen im Sinne der Förderung einer feuchten Wundheilung wird in der Praxis häufig Lanolin oder Muttermilch eingesetzt. Der Nachweis einer Wirksamkeit von Lanolin oder Muttermilch in der Therapie wundter Brustwarzen kann jedoch anhand der vorliegenden wissenschaftlichen Untersuchungen nicht abgeleitet werden.

##### Klinischer Konsensuspunkt

Anhand der langjährigen Erfahrungen aus der Praxis kann die topische Verwendung von Muttermilch oder hochgereinigtem Lanolin empfohlen werden (KKP).

Langjährige Erfahrungen mit Lanolin oder Muttermilch aus der Praxis weisen jedoch darauf hin, dass diese Behandlungsformen mit einer hohen Zufriedenheit und Akzeptanz der Frauen verbunden sind. Anhand dieser praktischen Erfahrung, aber nicht auf Grundlage wissenschaftlicher Studien, kann empfohlen werden, zur begleitenden Therapie wundter Brustwarzen Muttermilch oder Lanolin einzusetzen.

##### Evidenz- und konsensbasierte Empfehlung

Aufgrund der unzureichenden bzw. fehlenden Datenlage kann derzeit der Einsatz folgender Verfahren hinsichtlich einer Nutzen- und Schadenabwägung nicht beurteilt werden (0):

- ▶ Auflage von Brustkompressen zur feuchten Wundheilung (Hydrogel-Kompressen, Multi-Mam-Kompressen)
- ▶ Auflage von Teebeuteln (z. B. mit Salbei)
- ▶ Soft-Laser-Therapie (low level laser)
- ▶ Verwendung von Stilleinlagekonstruktionen zur Hohlagerung der Mamille

##### Evidenz- und konsensbasierte Empfehlung

Auf den Einsatz von Brusthütchen zur Therapie wundter Brustwarzen kann verzichtet werden (0).

##### Klinischer Konsensuspunkt

Zwingen starke Anlegesmerzen zu einer Stillpause an der betroffenen Brust, sollte die Brust (so häufig wie vorher gestillt wurde) manuell oder mechanisch entleert werden (KKP).

Bei der Verwendung von Pumpen ist auf eine korrekte Positionierung zu achten.

Bluthaltige Milch ist kein Grund für eine Stillpause.

##### Klinischer Konsensuspunkt

Alkoholische Lösungen, Cremes oder Salben auf Paraffinbasis sollen den betroffenen Frauen aufgrund der Nutzen-Schaden-Abwägung nicht empfohlen werden (KKP).

#### Therapie infizierter Brustwarzen

##### Hinweise zur Pflege

Neben der Händehygiene ist auch auf eine sorgfältige Reinigung der Brustwarzen (unter Anwendung steriler Kochsalzlösung, pH-neutraler Seifenlösung oder eines Antiseptikums) zu achten.

##### Evidenz- und konsensbasierte Empfehlung

Infizierte Brustwarzen stellen ein hohes Risiko für eine Mastitis dar und sollten antibiotisch therapiert werden (B).

##### Evidenz- und konsensbasierte Empfehlung

Eine systemische Applikation von Antibiotika ist der topischen Anwendung vorzuziehen (B).

##### Klinischer Konsensuspunkt

Vor Beginn einer kalkulierten Antibiotikatherapie soll Material zur mikrobiologischen Untersuchung gewonnen werden (KKP).

Wenngleich eine kalkulierte Antibiotikatherapie bereits vor Vorliegen des mikrobiologischen Befunds begonnen werden muss, wird empfohlen, Materialien für die mikrobiologische Diagnostik zu gewinnen. Nachträglich unter einer Antibiotikatherapie durchgeführte mikrobiologische Untersuchungen zum kulturellen Erregernachweis besitzen eine erheblich geringere Sensitivität und Spezifität. Kulturelle Erregernachweise erlauben nach Bestimmung des Antibiogramms eine Anpassung der Therapie spezifisch auf den nachgewiesenen Erreger. Dadurch können unnötig breite Antibiotikagaben vermieden werden und ggf. resistente Erreger (z.B. MRSA) erkannt und adäquat therapiert werden. Insbesondere im Zeitalter zunehmender Resistenzen wird so eine Fehltherapie verhindert. Weiterhin können hierdurch Erkenntnisse über die epidemiologische Erregersituation in der Einrichtung und daraus abzuleitende Konsequenzen für die kalkulierte Antibiotikatherapie gewonnen werden.

## Verstärkte initiale Brustdrüsenanschwellung

Die verstärkte Brustdrüsenanschwellung bezeichnet die schmerzhafte Schwellung und Vergrößerung der Brüste zu Beginn der Laktationsperiode. Ursache ist ein Lymphödem im Brustdrüsengewebe in Abgrenzung zum Milchstau. Die Brustdrüsenanschwellung kann sich auf die Areola oder auf die Peripherie der Brust beschränken oder beide Bereiche umfassen [11, 12]. Die verstärkte Brustdrüsenanschwellung beginnt häufig zwischen dem dritten und fünften Tag post partum.

### Symptome

- ▶ generalisierte Schwellung
- ▶ Schmerzen
- ▶ diffuse Ödeme
- ▶ Rötungen
- ▶ glänzende Hautoberfläche
- ▶ gestörter Milchfluss
- ▶ meist bilateral
- ▶ leicht erhöhte Temperatur ( $< 38,4^\circ\text{C}$ ) [11, 12]

### Differenzialdiagnosen

- ▶ Milchstau
- ▶ Mastitis
- ▶ (inflammatorisches) Mammakarzinom
- ▶ Erysipel
- ▶ Neurodermitis
- ▶ Dermatosen
- ▶ allergische Hauterscheinungen (u. a. Schmuck, Piercing, BH)
- ▶ mechanische, physikalische, medikamentöse, toxische exogene Gewebealterationen (u. a. BH, Manipulation, Verletzung, Temperatur, Creme)
- ▶ Morbus Paget

## Empfehlungen zur Therapie der verstärkten initialen Brustdrüsenanschwellung

### Klinischer Konsensuspunkt

Trotz der Schwellung der Brust soll eine regelmäßige Entleerung der Brust erfolgen. Eine Brustwarzenverletzung ist zu vermeiden. (KKP).

Durch die regelmäßige Entleerung der Brust wird der venöse und lymphatische Abfluss entlastet und die Milchbildung stimuliert. Es ist darauf zu achten, dass in den ersten Tagen nach der Geburt mindestens 8–12-mal/24 Stunden angelegt wird. Auch nachts sollte dieser Stillrhythmus beibehalten werden [12]. Wenn nicht gestillt werden kann, sollte die Brust regelmäßig manuell oder mechanisch entleert werden [13].

### Klinischer Konsensuspunkt

Bei Vorliegen einer starken Schwellung im Bereich der Areola kann die Reverse-Pressure-Softening-Technik eingesetzt werden, um ein korrektes Anlegen des Kindes zu erleichtern (KKP).

Die Reverse-Pressure-Softening-Technik wird unmittelbar vor dem Anlegen eingesetzt. Ziel ist es, durch sanften Druck einen Ring von Vertiefungen um die Mamille zu erzeugen und dadurch das Anlegen des Kindes zu erleichtern [14]. Das Verfahren sollte

nur nach Anleitung von geschultem Fachkräften oder Stillberaterinnen angewendet werden. Schmerzhafte Massagen bzw. jegliche Form von Gewaltanwendung müssen generell vermieden werden, da dadurch das Risiko für Gewebsschäden und nachfolgender Mastitis steigt.

### Klinischer Konsensuspunkt

Nichtsteroidale Antiphlogistika (z. B. Ibuprofen) können zur Schmerzlinderung eingesetzt werden (KKP).

Ibuprofen und seine Abbauprodukte gehen nur in geringen Mengen in die Muttermilch über. Deshalb ist bei kurzfristiger Anwendung eine Unterbrechung des Stillens in der Regel nicht erforderlich.

### Evidenz- und konsensbasierte Empfehlung

Aufgrund der unzureichenden bzw. fehlenden Datenlage kann derzeit der Einsatz folgender Verfahren hinsichtlich einer Nutzen-Schaden-Abwägung nicht beurteilt und daher derzeit keine Empfehlung für oder gegen diese Maßnahmen ausgesprochen werden (0):

- ▶ Auflage von Kohlblättern
- ▶ Auflage von Kühlkissen
- ▶ Auflage von Quark (topisch)
- ▶ Retterspitz (topisch)
- ▶ Akupunktur
- ▶ Tiefdruckmassage
- ▶ Massagen nach Plata Rueda oder Marmet
- ▶ therapeutischer Ultraschall

Anhand der Studienlage zu Kohlblättern und Kühlkissen lässt sich keine Überlegenheit einer Methode gegenüber der anderen ableiten. Gleichzeitig ist die Wirksamkeit von Kohlblättern oder Kühlkissen weder belegt noch widerlegt worden. Der Einfluss der natürlichen Verbesserung über die Zeit auf die beobachteten Effekte der Brustauflagen kann nicht abgeschätzt werden. Es fehlen Untersuchungen, die diese Behandlungsformen gegen Placebo oder einer Kontrollgruppe ohne Intervention vergleichen. Für die topischen Anwendungen von Quark oder Retterspitz und für den Einsatz von Akupunktur konnten keine Studien identifiziert werden, die deren Wirksamkeit bei der Therapie verstärkter initialer Brustdrüsenanschwellung überprüfen. In der Praxis wird eine Tiefdruckmassage eingesetzt, um die Schwellung und den Druck in der Brust zu mindern. Mit dieser Massage soll die gestaute Lymphflüssigkeit in Richtung der Lymphbahnen abgeführt werden. Wissenschaftliche Evidenz liegt dazu nicht vor. Zur Stimulation des Milchspendereflexes wird in der Praxis vor dem Stillen Wärme in Kombination mit Massagen (nach Plata Rueda oder Marmet) angewendet, um den Milchfluss und damit die Brustentleerung zu fördern [13]. Wissenschaftliche Studien konnten nicht identifiziert werden, die diese Behandlungsmethode untersuchten.

In einer randomisierten kontrollierten Doppelblindstudie, in der 85% der Patientinnen an Brustdrüsenanschwellung litten, wurden Ultraschallbehandlungen mit Scheinultraschallbehandlungen verglichen und gezeigt, dass sich durch beide Interventionen Schmerzen und Verhärtungen gleichermaßen reduzieren. Die Studie liefert damit Hinweise, dass die erzielten Verbesserungen nicht auf die eingesetzten Ultraschallwellen, sondern auf Placeboeffekten beruhen [15]. Darüber hinausgehende Daten zum

Nutzen und Schaden von Ultraschallbehandlungen in der Therapie verstärkter initialer Brustdrüsenschwellung fehlen.

#### Klinischer Konsensuspunkt

Aufgrund langjähriger Erfahrungen aus der Praxis können Auflagen in Form von Kühlkissen, Kohlblättern oder Quark sowie die Anwendung einer Tiefdruckmassage zur symptomatischen Behandlung eingesetzt werden (KKP).

In der Praxis werden zur Behandlung der verstärkten initialen Brustdrüsenschwellung Kühlkissen und Kohlblätter ebenso wie Quarkauflagen seit Jahren eingesetzt. Langjährige Erfahrungen liegen auch für die Anwendung von Tiefdruckmassagen vor. Dabei empfinden Frauen die Anwendung dieser Methoden individuell verschieden. Auch wenn wissenschaftliche Evidenz nicht vorliegt, können auf Grundlage dieser praktischen Erfahrungen die Anwendung von Kohlblättern, Kühlkissen oder Quark sowie Tiefdruckmassagen zur symptomatischen Behandlung bei verstärkter initialer Brustdrüsenschwellung empfohlen werden, wobei die Wahl dieser Anwendungen einer individuellen Entscheidung unterliegt.

### Milchstau und Mastitis

In der internationalen wissenschaftlichen Literatur als auch in der Praxis werden die Begriffe Milchstau und Mastitis unterschiedlich gedeutet. Entweder wird Mastitis ausschließlich als eine Infektion der Brustdrüse definiert oder es wird darunter eine Entzündung der Brustdrüse verstanden, die mit oder ohne Infektion einhergehen kann [16]. Folgende Definitionen wurden für die Leitlinie verwendet:

Mastitis puerperalis ist eine in der Stillzeit auftretende Entzündung in der Brustdrüse, die durch Behinderung des effektiven Milchflusses verursacht wird oder infektiös bedingt auftritt.

#### Symptome bei Mastitis puerperalis

- ▶ örtlich begrenzte gerötete, überwärmte und geschwollenen Bereiche der Brust
- ▶ lokale starke Schmerzen in der Brust
- ▶ systemische Reaktionen wie Unwohlsein und Fieber ( $> 38,4^{\circ}\text{C}$ )
- ▶ lokale Symptome meist unilateral, in selteneren Fällen bilateral [11]

Milchstau beschreibt einen Zustand, bei dem durch Blockierung eines Milchgangs dieser unzureichend entleert wird. Der resultierende Druckanstieg in dem Milchgang führt zu lokalen Beschwerden in der Brust, ohne dass das Allgemeinbefinden beeinträchtigt ist.

#### Symptome bei Milchstau (blocked ducts)

- ▶ lokale Schmerzen
- ▶ lokale Verhärtung („Knoten“)
- ▶ keine oder leichte Überwärmung der betroffenen Stellen
- ▶ kein Fieber ( $< 38,4^{\circ}\text{C}$ )
- ▶ gutes Allgemeinbefinden
- ▶ unilateral
- ▶ z. T. ein kleines weißes Bläschen auf der Mamille (white blister) [11, 12]

### Differenzialdiagnosen

- ▶ Brustabszess
- ▶ (inflammatorisches) Mammakarzinom

### Empfehlungen zur Therapie eines Milchstaus und zur Therapie einer Mastitis

#### Klinischer Konsensuspunkt

Vor Beginn einer Therapie eines Milchstaus oder einer Mastitis sollen folgende Ursachen evaluiert werden (KKP):

- ▶ Stilltechnik
- ▶ Stillfrequenz
- ▶ wund Brustwarzen
- ▶ verstärkte initiale Brustdrüsenschwellung
- ▶ mechanische Blockierung des Milchflusses
- ▶ verstärkter Milchfluss
- ▶ traumatische Läsionen
- ▶ fehlender Milchspendereflex (Stress, Schlafentzug)
- ▶ psychische Faktoren
- ▶ mangelnde Hygiene

Kontrollierte Studien, die explizit den Effekt der Stillberatung und emotionalen Unterstützung in der Therapie eines Milchstaus oder einer Brustentzündung untersuchen, liegen nicht vor. Jedoch weisen langjährige Erfahrungen darauf hin, dass für eine erfolgreiche Therapie eine ganzheitliche Betreuung der betroffenen Frauen notwendig ist. Für Informationen zu psychosomatischen Aspekten wird auf die Fachliteratur der Psychosomatischen Frauenheilkunde verwiesen.

#### Evidenz- und konsensbasierte Empfehlung/ Klinischer Konsensuspunkt

Eine regelmäßige Brustentleerung ist bei Mastitis (A) und bei Milchstau (KKP) zur Entlastung des Drüsengewebes essenziell.

Gegebenenfalls soll die Brust manuell oder mechanisch entleert werden (KKP).

Erfahrungen aus der Praxis sprechen dafür, dass eine effiziente Brustentleerung durch die Stimulation des Milchspendereflexes gefördert wird. Massagen nach Plata Rueda bzw. nach Marmet werden zu diesem Zweck eingesetzt. Wissenschaftliche Untersuchungen liegen dazu nicht vor.

Eine suffiziente Brustentleerung zur Entlastung des Drüsengewebes wird auch dadurch unterstützt, dass an der betroffenen Seite zu stillen begonnen wird. Bei zu starken Schmerzen ist es hilfreich, das Kind zuerst an der symptomfreien Brust anzulegen und nach Einsetzen des Milchspendereflexes zur betroffenen Brust zu wechseln [12, 17].

#### Klinischer Konsensuspunkt

Physikalische Maßnahmen können angewendet werden (KKP):

- ▶ Wärme vor dem Stillen/der manuellen oder mechanischen Entleerung der Brust
- ▶ Kühlen nach dem Stillen/der manuellen oder mechanischen Entleerung der Brust

Die alternierende Applikation von Wärme und Kühlung an der betroffenen Brust kann den Milchfluss unterstützen und die Beschwerden mindern. Wärme vor dem Stillen, z.B. in Form von warmen Kompressen oder Packungen, stimuliert den Milchfluss. Die nach dem Stillen einzusetzenden kühlenden Maßnahmen verringern die Schwellung und Schmerzen [12, 17, 18].

#### Klinischer Konsensuspunkt

Das Ausstreichen blockierter Areole der Brust bei Milchstau oder Mastitis kann zur Therapie angewandt werden. Dabei ist jegliche Anwendung eines für die Mutter unangenehmen Druckes zu vermeiden. (KKP)

Der Milchfluss kann durch leichte Massage der blockierten Bereiche in Richtung Mamille während des Stillens unterstützt werden [17]. Wissenschaftliche Evidenz dafür liegt allerdings nicht vor.

#### Evidenz- und konsensbasierte Empfehlung

Aufgrund der unzureichenden bzw. fehlenden Datenlage kann derzeit der Einsatz folgender Verfahren hinsichtlich einer Nutzen-Schaden-Abwägung nicht beurteilt werden (0):

- ▶ Akupunktur
- ▶ Homöopathie
- ▶ Vibration

#### Klinischer Konsensuspunkt

Nichtsteroidale Antiphlogistika können als analgetische Maßnahme eingesetzt werden (KKP).

Führen die angewendeten konservativen Maßnahmen nach 24–48 Stunden nicht zu einer relevanten klinischen Besserung bzw. tritt trotz konsequenter Therapie eine deutliche Verschlechterung ein, ist von einer bakteriellen Mastitis mit erhöhtem Risiko für eine Abszessbildung auszugehen.

#### Evidenz- und konsensbasierte Empfehlung

Die bakterielle Mastitis soll antibiotisch therapiert werden (A).

Bei der Wahl des Antibiotikums sollte auf dessen Vereinbarkeit mit dem Stillen geachtet werden. Als Mittel der ersten Wahl haben sich Cephalosporine der 1. und 2. Generation oder Betalaktamase-Inhibitor-geschützte Penicilline bewährt, die sicher für die Mutter und das Kind sind. Eine antibiotische Therapie, die weniger als 10 bis 14 Tage dauert, ist mit einem erhöhten Rezidivrisiko verbunden [12,17]. Bei Allergie gegen Penicillin- bzw. Betalaktam-Antibiotika kann bei nachgewiesener Empfindlichkeit auch Clindamycin eingesetzt werden.

#### Klinischer Konsensuspunkt

Für die kalkulierte Antibiotikatherapie sind die wichtigsten Erreger (*S. aureus*, beta-hämolysierende Streptokokken) zu berücksichtigen (KKP).

Obwohl aus dem Ausland über eine erhöhte Inzidenz von Mastitiden durch Methicillin-resistente *S. aureus* (MRSA) berichtet wird, sind in Deutschland ambulant erworbene, durch MRSA verursachte Mastitiden noch selten [19]. Bei MRSA sind Penicilline, Cephalosporine der 1.–4. Generation sowie Carbapeneme nicht wirksam. Die Therapie sollte in enger Absprache mit dem den Erregernachweis durchführenden Mikrobiologen gemäß Empfindlichkeitsbestimmung (Resistogramm) sowie unter Beachtung von pharmakokinetischen Kriterien (z.B. Gewebegängigkeit) und ggf. von Zulassungsbeschränkungen erfolgen. Laut den Empfehlungen der Paul-Ehrlich-Gesellschaft für Chemotherapie (PEG) zur kalkulierten Antibiotikatherapie von Haut- und Weichteilinfektionen stellen Linezolid, Daptomycin, Tigecyclin, Glykopeptide (jeweils Empfehlungsstärke A) und Cotrimoxazol (Empfehlungsstärke B) sowie als Kombinationspartner ggf. zusätzlich Fosfomycin oder Rifampicin bei MRSA einsetzbare Antibiotika dar [20]. Für den Umgang mit MRSA wird auf die Empfehlungen des Robert Koch-Instituts zur Prävention und Kontrolle von MRSA in Krankenhäusern und anderen medizinischen Einrichtungen sowie deren Aktualisierungen hingewiesen.

#### Klinischer Konsensuspunkt

Vor Beginn einer kalkulierten Antibiotikatherapie soll Material zur mikrobiologischen Untersuchung gewonnen werden (KKP).

#### Klinischer Konsensuspunkt

Eine infektionsbedingte Mastitis ist kein Grund zum Abstillen (KKP).

Ob bei Reifgeborenen eine kurzfristige Stillpause mit Abpumpen und Verwerfen der Muttermilch im Falle infektionsbedingter Mastitis eingelegt wird oder die Milch weiter gefüttert werden kann, unterliegt einer individuellen Entscheidung. Bei selten auftretenden Infektionen mit  $\beta$ -hämolysierenden Streptokokken der Gruppe B, die mit einer bilateralen Mastitis einhergehen, soll eine Stillpause und gegebenenfalls auch eine simultane Antibiotikatherapie bei dem Säugling durchgeführt werden. Frühgeborenen sollte die Milch bei Vorliegen bakterieller Mastitis nicht gefüttert werden.

Bei Abszessbildung sind als erste Option die Abszesspunktion und in zweiter Linie chirurgische Maßnahmen (u.a. Abszessspaltung, Drainage) jeweils im Verein mit einer Antibiotikatherapie indiziert. Ein Abstillen ist in der Regel nicht notwendig. Weiterführende Empfehlungen zur Therapie des Brustabszesses werden bei der Aktualisierung dieser Leitlinie berücksichtigt.

#### Diskussion

▼ Mit dieser Leitlinie werden Empfehlungen zur Therapie entzündlicher Brusterkrankungen in der Stillzeit bereitgestellt. Diese Empfehlungen sollen die Versorgung der stillenden Frauen mit Stillproblemen verbessern und helfen, Stillbarrieren abzubauen. Insgesamt erwies sich die Datenlage für die Ableitung der Empfehlungen als gering. Nur wenige Studien existieren für diese Versorgungsprobleme auf hohem Evidenzniveau. Sowohl ökonomische als auch ethische Aspekte führen zu dieser reduzierten Datenlage. Da die mütterlichen und kindlichen Vorteile des Stil-

lens evident sind, ist beispielsweise die Durchführung prospektiver kontrollierter Studien mit randomisierter Zuteilung der Probandinnen in Weiterstillen und Nichtweiterstillen nicht vertretbar. Zudem bestehen wenig ökonomische Interessen, sodass die Studienzahl aufgrund mangelnder finanzieller Unterstützungsmöglichkeiten insgesamt eher gering ist.

Aufgrund limitierter Daten konnten in der Leitlinie nicht nur evidenz- und konsensbasierte Empfehlungen abgeleitet werden. Um für Fragestellungen, zu denen keine Untersuchungen möglich sind, trotzdem Handlungsempfehlungen bereitzustellen, wurden von den Experten Klinische Konsensuspunkte auf Basis ihrer praktischen Erfahrungen formuliert.

Besonders im Hinblick auf die hohe präventive und gesundheitsökonomische Bedeutung des Stillens sollten Forschungsaktivitäten unbedingt gefördert werden, die Evidenzlücken in der Therapie der stillassozierten Brusterkrankungen reduzieren und Daten generieren, die zukünftig in die Evidenzbasierung der Leitlinie einfließen können.

## Danksagung

Wir danken Frau Dr. Cathleen Muche-Borowski herzlich für die umfangreiche methodische Beratung sowie für die Moderation des Konsensusverfahrens im Rahmen der Leitlinienerstellung.

## Interessenkonflikt

Es bestehen keine bedeutsamen Interessenkonflikte (siehe Leitlinienreport unter [www.awmf.org/leitlinien/detail/ll/015-071.html](http://www.awmf.org/leitlinien/detail/ll/015-071.html)).

## Institute

- <sup>1</sup> Charité – Universitätsmedizin Berlin, Klinik für Dermatologie, Berlin
- <sup>2</sup> Bundesinstitut für Risikobewertung, Abteilung für Lebensmittelsicherheit, Berlin
- <sup>3</sup> St. Joseph-Krankenhaus Berlin Tempelhof, Klinik für Geburtshilfe und Gynäkologie, Berlin
- <sup>4</sup> Universitätsklinikum Münster, Institut für Medizinische Mikrobiologie, Münster
- <sup>5</sup> Füssen-Weißensee
- <sup>6</sup> Ruhr-Universität Bochum, Institut für Hygiene und Mikrobiologie, Bochum
- <sup>7</sup> Hamburg
- <sup>8</sup> Medizinische Hochschule Hannover, Klinik für Frauenheilkunde und Geburtshilfe, Hannover
- <sup>9</sup> Evangelisches Waldkrankenhaus Spandau, Abteilung für Kinder- und Jugendmedizin, Berlin
- <sup>10</sup> Universität Gießen-Marburg, Klinik für Geburtshilfe und Perinatalmedizin, Marburg
- <sup>11</sup> Bühl
- <sup>12</sup> Hamburg
- <sup>13</sup> Universitätsklinikum Schleswig-Holstein, Campus Kiel, Klinik für Gynäkologie und Geburtshilfe, Kiel
- <sup>14</sup> Bad Oeyhausen
- <sup>15</sup> Berlin
- <sup>16</sup> Universitätsklinikum Ulm, Klinik für Frauenheilkunde und Geburtshilfe, Ulm

## Literatur

- 1 Kohlhuber M, Rebhan B, Schwegler U et al. Breastfeeding rates and duration in Germany: a Bavarian cohort study. *Br J Nutr* 2008; 99: 1127–1132
- 2 Rebhan B, Kohlhuber M, Schwegler U et al. Stillfrequenz und Stillprobleme – Ergebnisse der Bayerischen Stillstudie. *Gesundheitswesen* 2008; 70 (Suppl. 1): 8–12
- 3 Schwartz K, D'Arcy HJ, Gillespie B et al. Factors associated with weaning in the first 3 months postpartum. *J Fam Pract* 2002; 51: 439–444
- 4 Gunther M. Sore nipples. Causes and prevention. *Lancet* 1945; 246: 590–593
- 5 Livingstone V. Breastfeeding and sore Nipples. *Medicine North America*; 1997. Online: <http://www.breastfeedingclinic.com/ckfinder/userfiles/files/Breastfeeding%20and%20sore%20nipples.pdf>; Stand: 13.12.2013
- 6 Ziemer MM, Pigeon JG. Skin changes and pain in the nipple during the 1st week of lactation. *JOGNN* 1993; 22: 247–256
- 7 Walker M, Driscoll JW. Sore nipples: the new mother's nemesis. *Am J Matern Child Nurs* 1989; 14: 260–265
- 8 Walker M. Conquering common breast-feeding problems. *J Perinat Neonatal Nurs* 2008; 22: 267–274
- 9 Woolridge MW. Aetiology of sore nipples. *Midwifery* 1986; 2: 172–176
- 10 Walker M. Breastfeeding Management for the Clinician. Using the Evidence. Sudbury, MA: Jones and Bartlett Publisher; 2006
- 11 WHO. Mastitis. Causes and Management. 2000. WHO reference number: WHO/FCH/CAH/00.13. Online: [http://whqlibdoc.who.int/hq/2000/WHO\\_FCH\\_CAH\\_00.13.pdf](http://whqlibdoc.who.int/hq/2000/WHO_FCH_CAH_00.13.pdf); Stand: 13.12.2013
- 12 Lawrence R, Lawrence R. Breastfeeding – a Guide for the medical Profession. 7th ed. Maryland Heights: Elsevier, Mosby; 2011
- 13 Europäisches Institut für Laktation und Stillen. Massieren der Brust und manuelles Gewinnen von Muttermilch. 2011. Seminarreihe Intensiv: Qualifikation zur Still- und Laktationsberaterin IBCLC 2011/2012. Online: [http://www.stillen-institut.com/asp\\_service/upload/content/04.-Brustmassage\\_Gewinnung-Hand-2011-01-02.pdf](http://www.stillen-institut.com/asp_service/upload/content/04.-Brustmassage_Gewinnung-Hand-2011-01-02.pdf); Stand: 13.12.2013
- 14 Cotterman KJ. Reverse pressure softening: a simple tool to prepare areola for easier latching during engorgement. *J Hum Lact* 2004; 20: 227–237
- 15 McLachlan Z, Milne E, Lumley J et al. Ultrasound treatment for breast engorgement: A randomised double blind trial. *Aust J Physiother* 1991; 37: 23–28
- 16 Kvist LJ. Toward a clarification of the concept of mastitis as used in empirical studies of breast inflammation during lactation. *J Hum Lact* 2010; 26: 53–59
- 17 ABM – The Academy of Breastfeeding Medicine Protocol Committee. ABM clinical protocol #4: Mastitis. Revision, May 2008. *Breastfeed Med* 2008; 3: 177–180
- 18 Zielpatenschaft Stillförderung der Hamburgischen Arbeitsgemeinschaft für Gesundheitsförderung e.V. (HAG). Hamburger Still-Empfehlungen. 2009. Online: <http://www.hag-gesundheit.de/uploads/docs/45.pdf>; Stand: 13.12.2013
- 19 Köck R, Becker K, Peters G. Die Bedeutung resistenter Keime in der Gynäkologie. *Gynäkologie und Geburtshilfe* 2010; 7–8: 26–28
- 20 Bodmann K-F, Grabein B; Expertenkommission der Paul-Ehrlich-Gesellschaft für Chemotherapie e.V. Empfehlungen zur kalkulierten parenteralen Initialtherapie bakterieller Erkrankungen bei Erwachsenen – Update 2010. *Chemotherapie Journal* 2010; 19: 179–255

Die Referenzen der im Rahmen der Evidenzbasierung systematisch bewerteten Studien sind der Langfassung zu entnehmen.
